# Supplementary material for: Inhibition of the de novo pyrimidine biosynthesis pathway limits ribosomal RNA transcription causing nucleolar stress in glioblastoma cells
Source: PubMed Central journal article supplement (PMC7707548; doi:10.1371/journal.pgen.1009117), 2020-11-17
Supplement: pgen.1009117.s001.pdf [file pgen.1009117.s001.pdf]

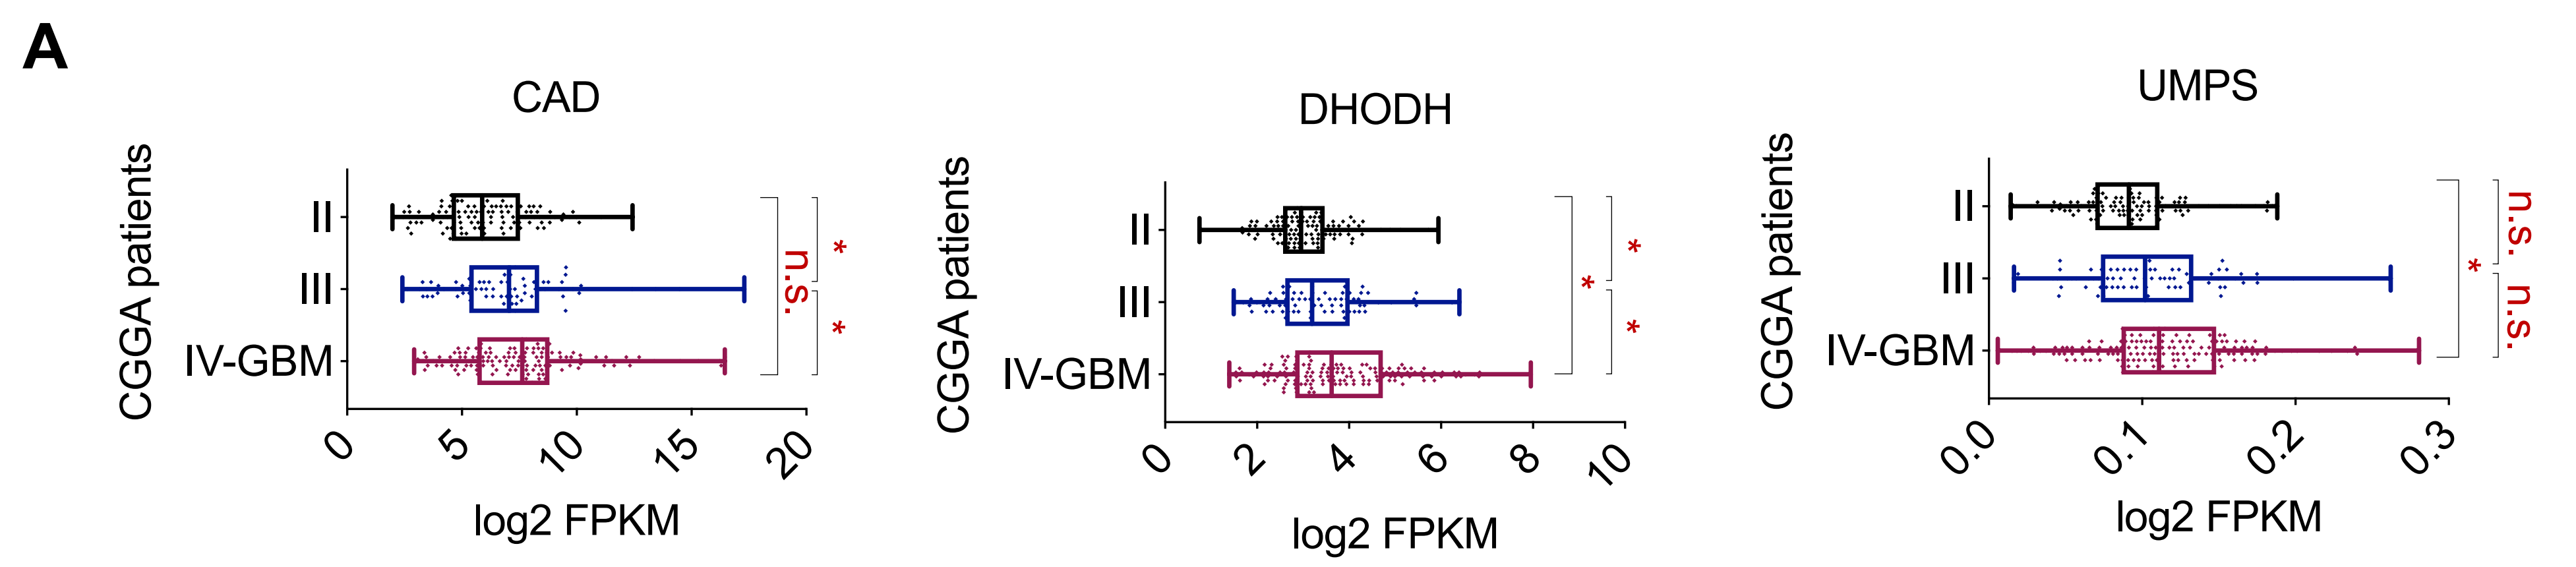

**B**

|                         | origin          | cell type                   | Gender  | Age     | p14ARF status    | p53 status            | p53 activity (p21 expression) |
|-------------------------|-----------------|-----------------------------|---------|---------|------------------|-----------------------|-------------------------------|
| <b>Human astrocytes</b> | commercial      | astrocytes                  | unknown | unknown | deleted (CRISPR) | WT                    | unknown                       |
| <b>ARPE-19</b>          | commercial      | retinal epithelial          | Male    | 19      | unknown          | unknown               | unknown                       |
| <b>LN229</b>            | commercial      | glioblastoma (WHO IV grade) | Female  | 60      | deleted          | P98L                  | active                        |
| <b>SF188</b>            | commercial      | glioblastoma (WHO IV grade) | Male    | 8       | unknown          | G266E                 | inactive                      |
| <b>GBM9</b>             | patient-derived | glioblastoma (WHO IV grade) | unknown | unknown | unknown          | unknown (non deleted) | inactive                      |

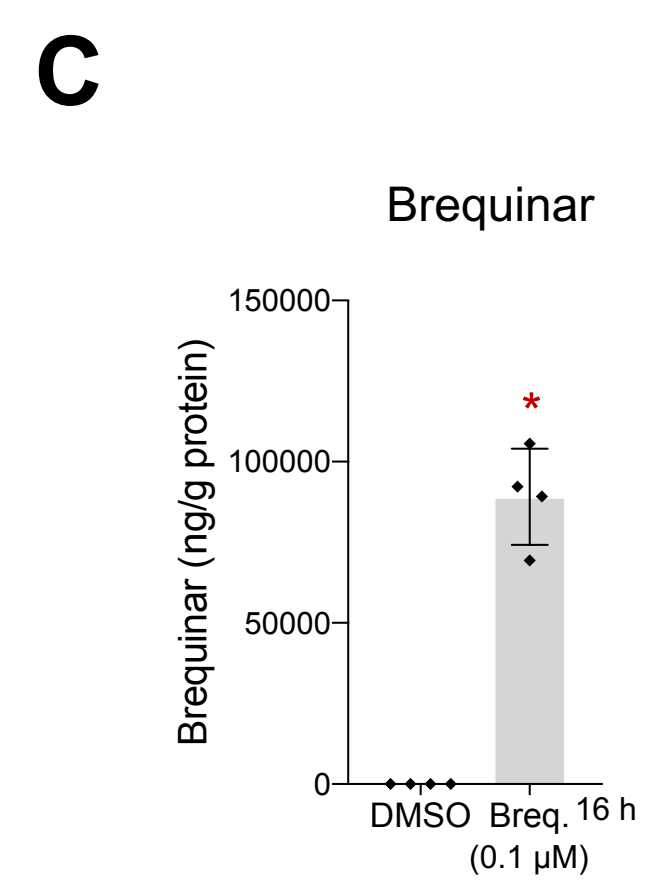

Figure S1
