# Supplementary material for: Inhibition of the de novo pyrimidine biosynthesis pathway limits ribosomal RNA transcription causing nucleolar stress in glioblastoma cells
Source: PubMed Central journal article supplement (PMC7707548; doi:10.1371/journal.pgen.1009117), 2020-11-17

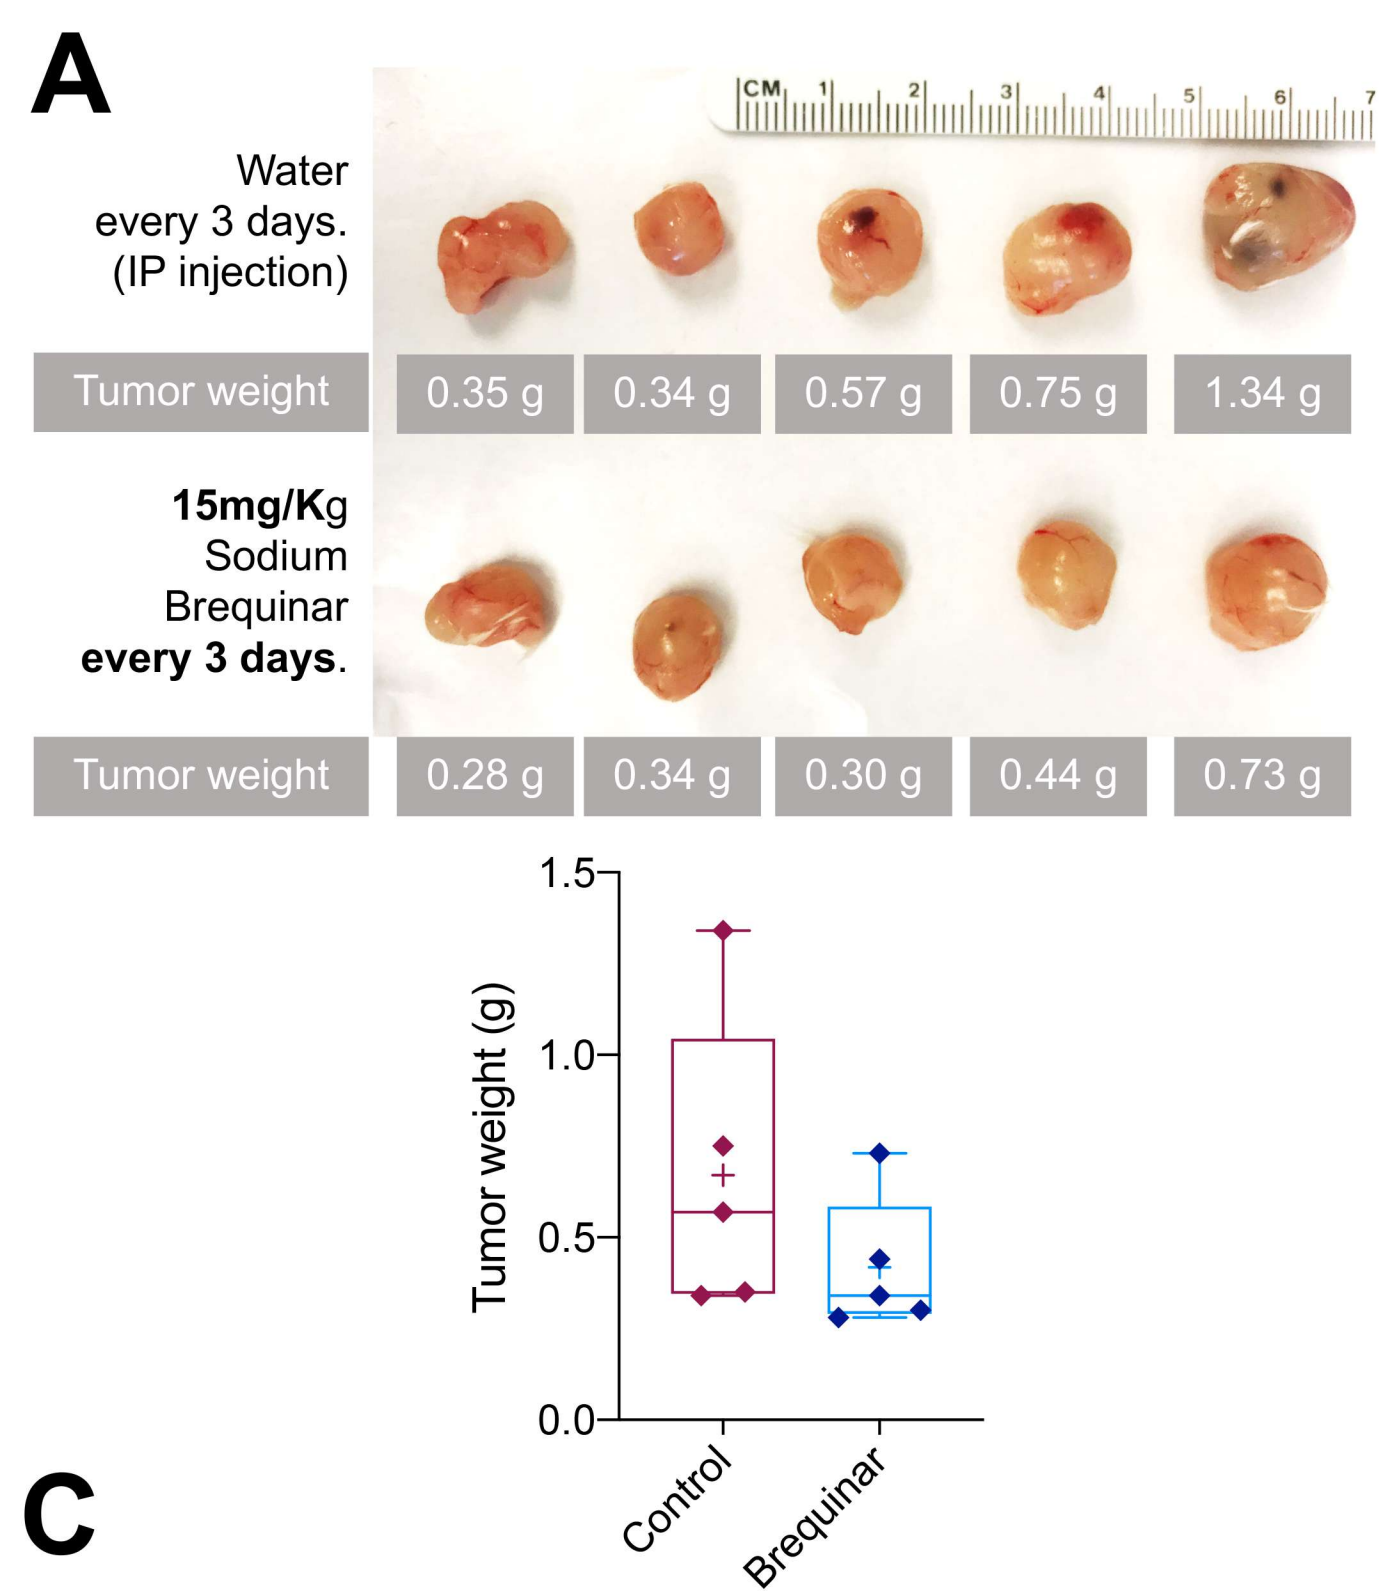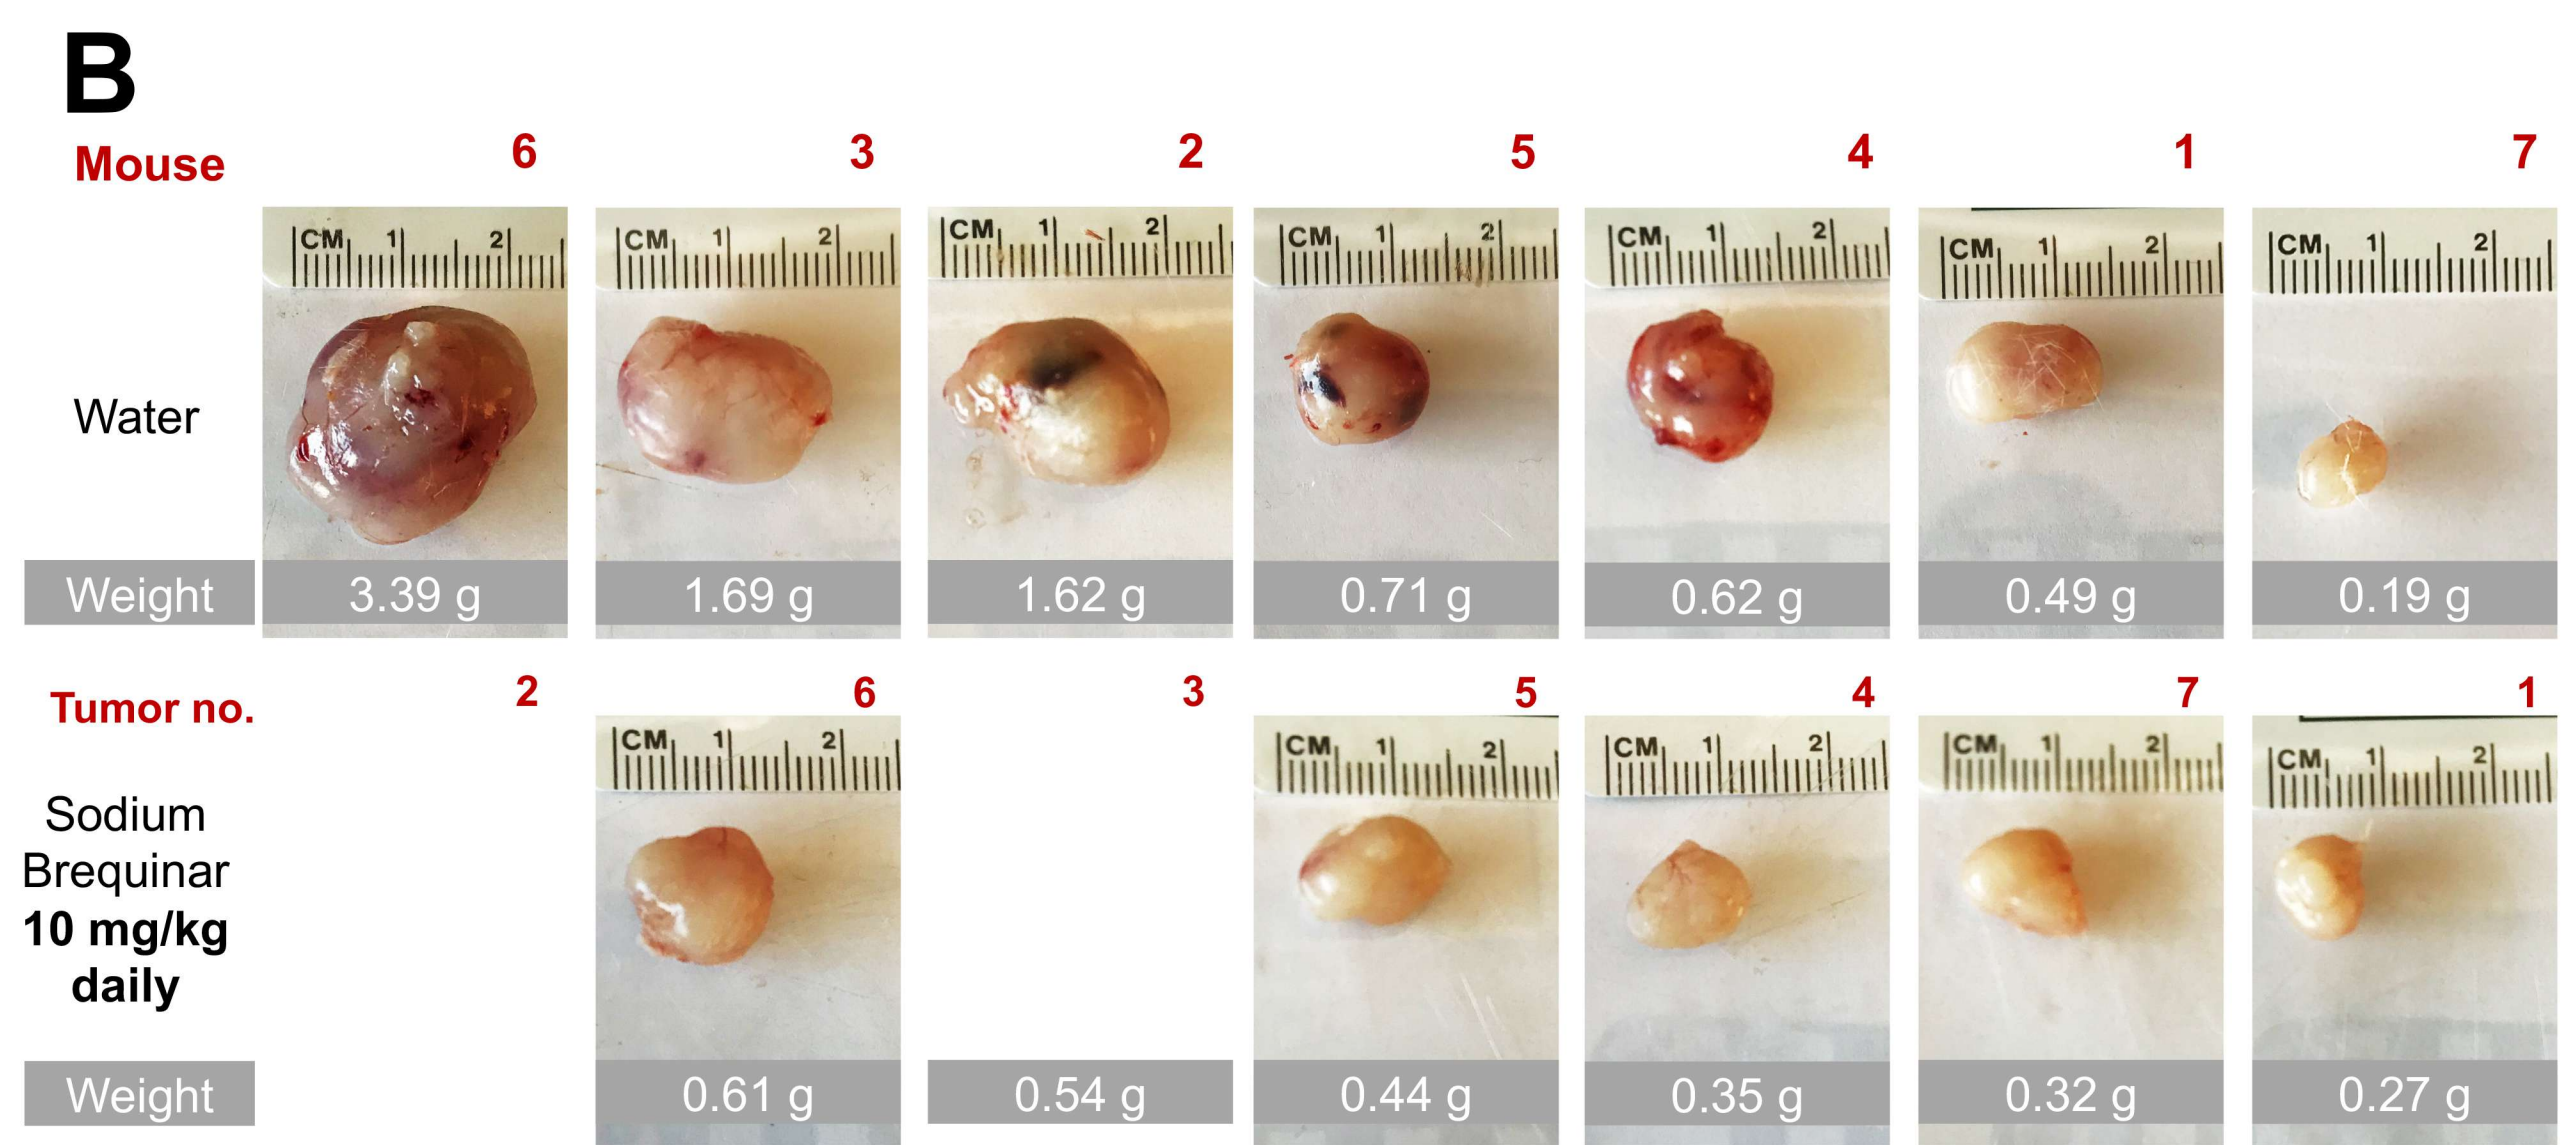

\* Tumor #2 in brequinar group was an outlier.

\*\* Picture of tumor #3 in brequinar group was not available.

**C**

| Mouse   | Tumor weight |           | Mouse weight |           | $\Delta$ (Mouse weight - Tumor weight) |           |
|---------|--------------|-----------|--------------|-----------|----------------------------------------|-----------|
|         | Control      | Brequinar | Control      | Brequinar | Control                                | Brequinar |
| 1       | 0.49         | 0.27      | 23.2         | 22.16     | 22.71                                  | 21.89     |
| 2       | 1.62         | outlier   | 22.56        | 25.8      | 20.94                                  | 24.32     |
| 3       | 1.69         | 0.54      | 24.66        | 22.58     | 22.97                                  | 22.04     |
| 4       | 0.62         | 0.35      | 24.6         | 19.84     | 23.98                                  | 19.49     |
| 5       | 0.71         | 0.44      | 22.16        | 21.29     | 21.45                                  | 20.85     |
| 6       | 3.39         | 0.61      | 24.26        | 21.4      | 20.87                                  | 20.79     |
| 7       | 0.19         | 0.32      | 20.62        | 20.36     | 20.43                                  | 20.04     |
| average | 1.24         | 0.57      | 23.15        | 21.92     | 21.91                                  | 21.35     |
| SD      | 1.10         | 0.42      | 1.49         | 1.96      | 1.32                                   | 1.60      |
| p-value |              | 0.16      |              | 0.21      |                                        | 0.49      |

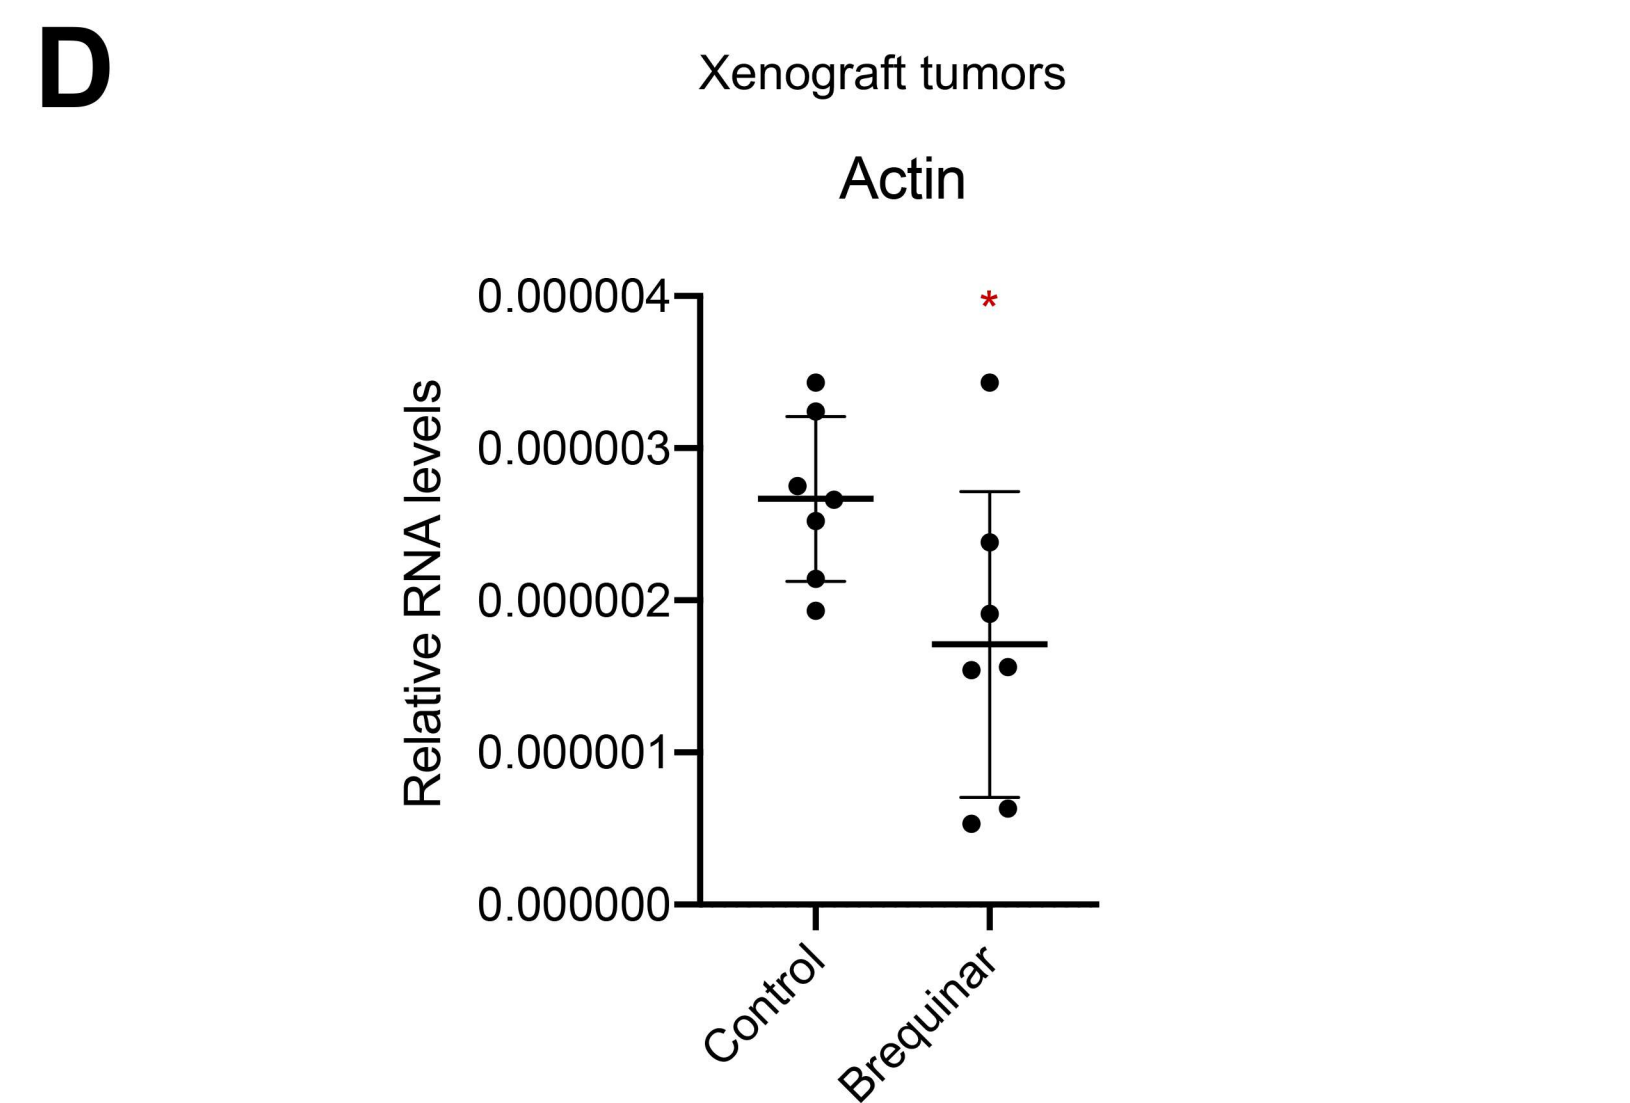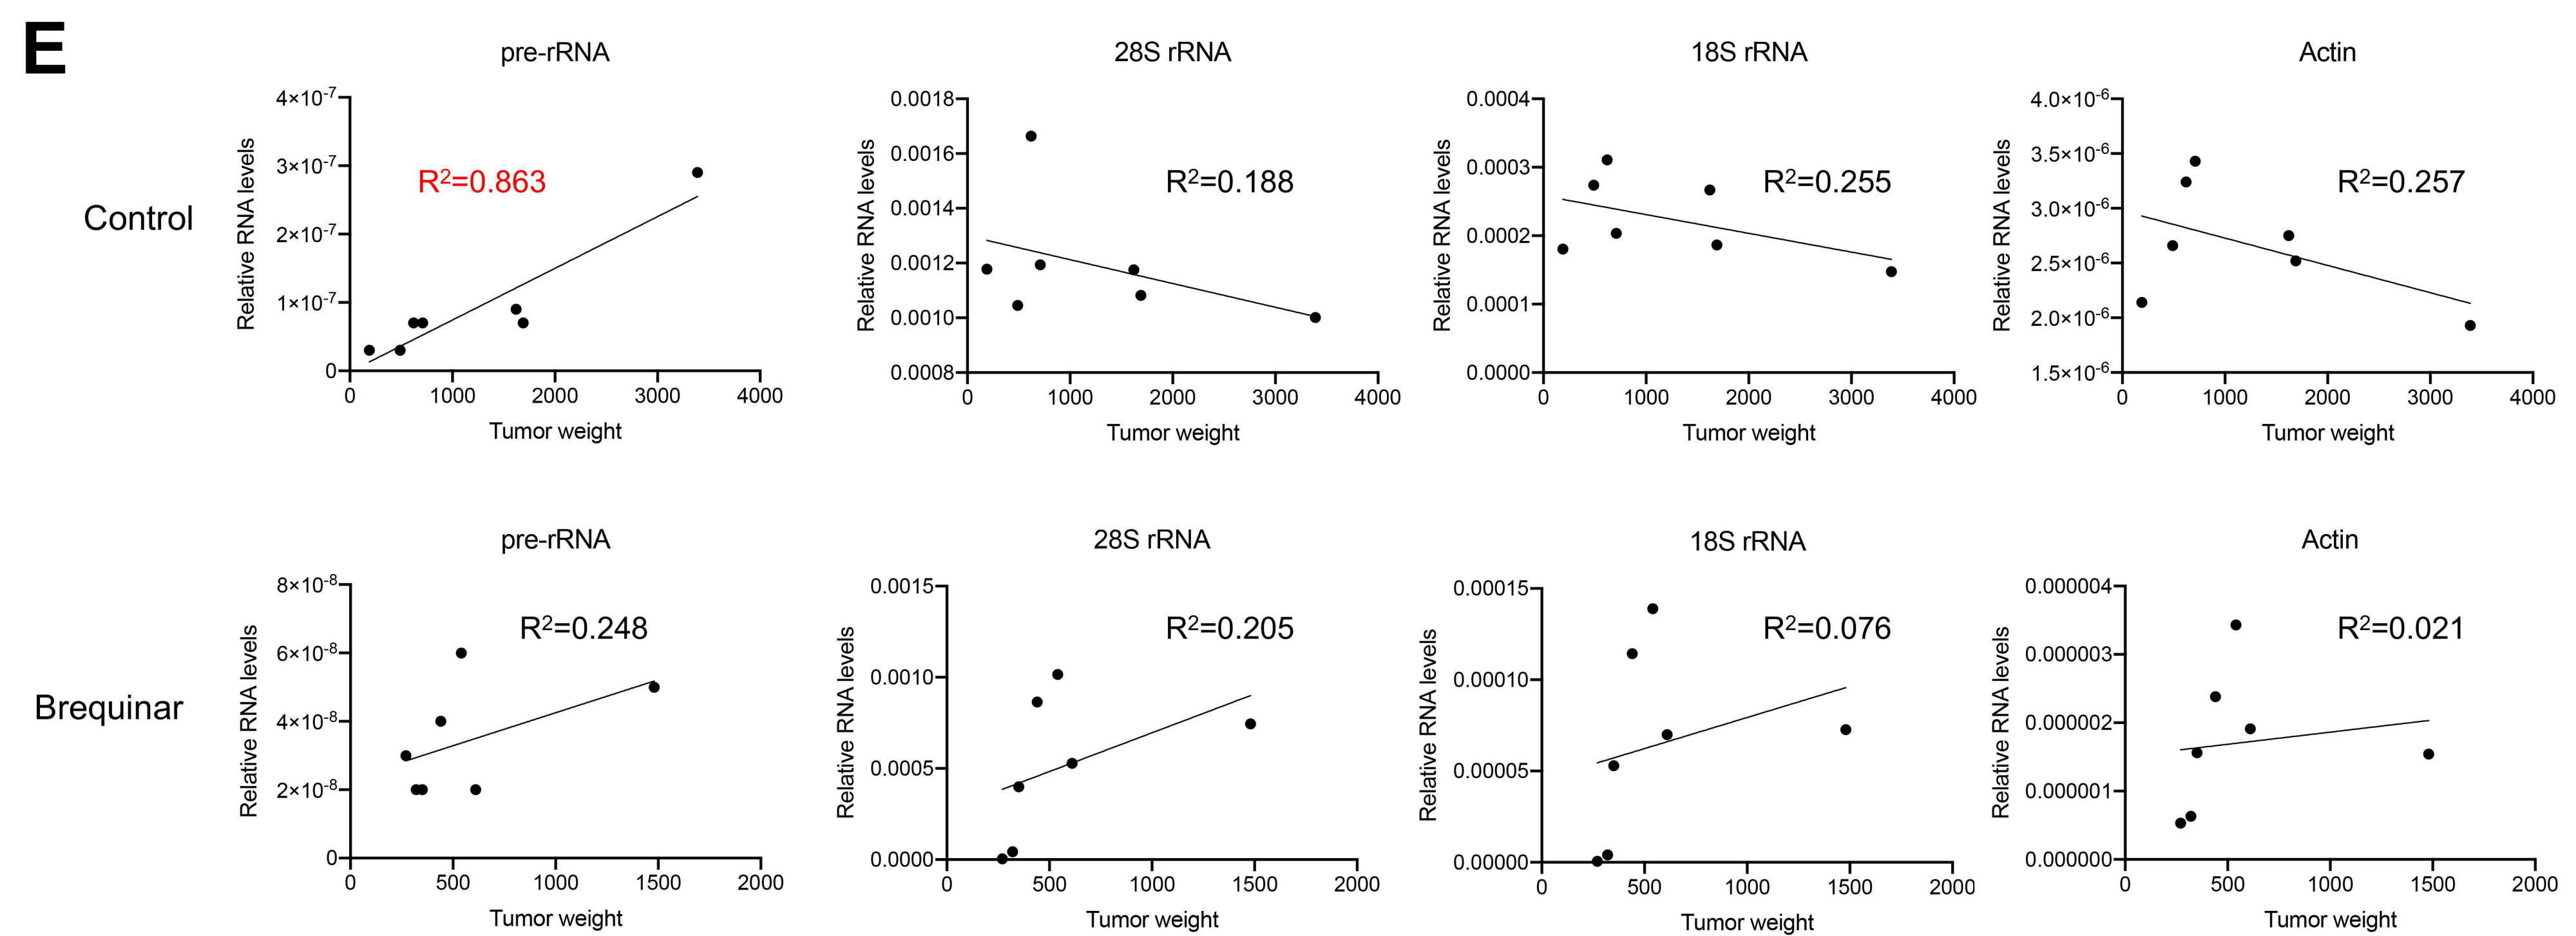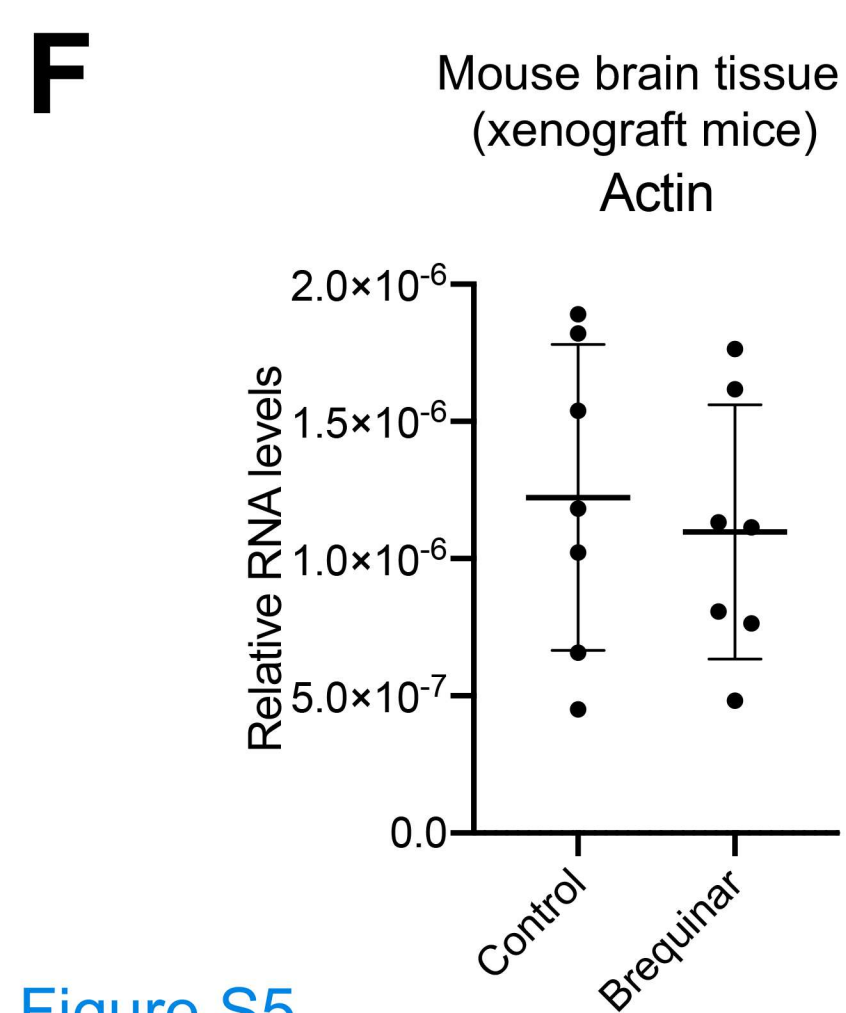

Supplement: pgen.1009117.s005.pdf [file pgen.1009117.s005.pdf]
