# Supplementary material for: Inhibition of the de novo pyrimidine biosynthesis pathway limits ribosomal RNA transcription causing nucleolar stress in glioblastoma cells
Source: PubMed Central journal article supplement (PMC7707548; doi:10.1371/journal.pgen.1009117), 2020-11-17
Supplement: pgen.1009117.s006.pdf [file pgen.1009117.s006.pdf]

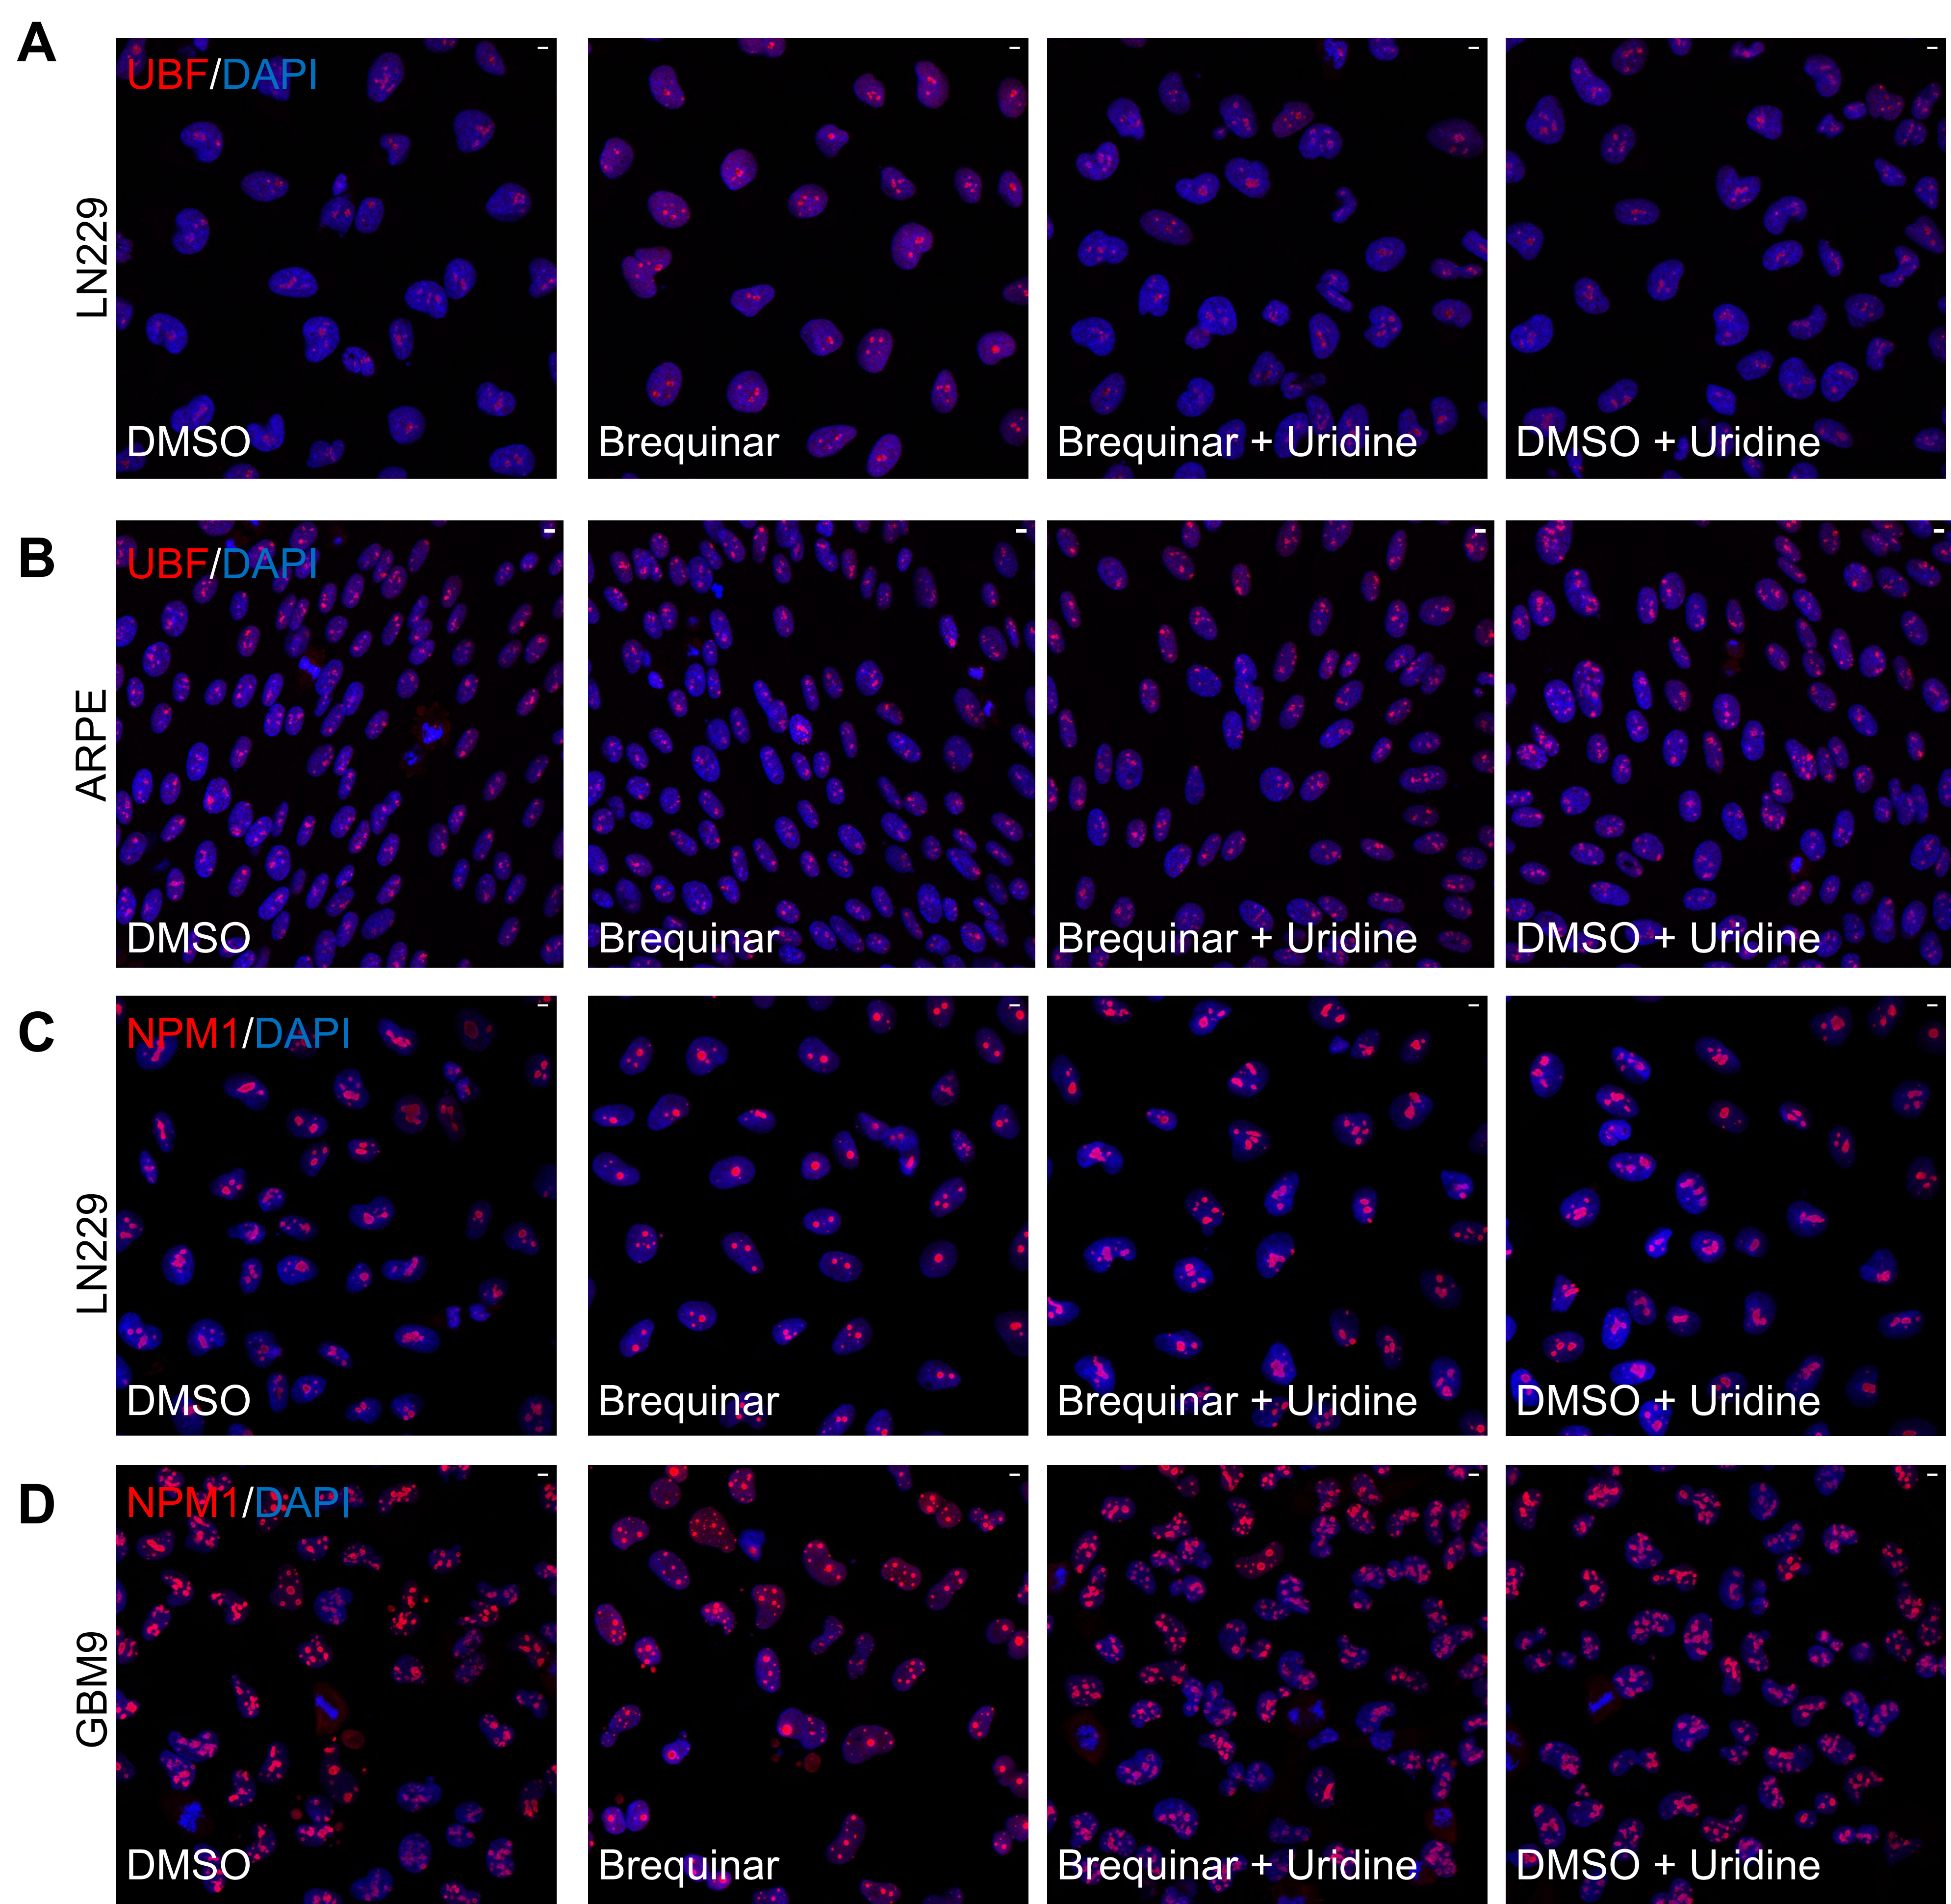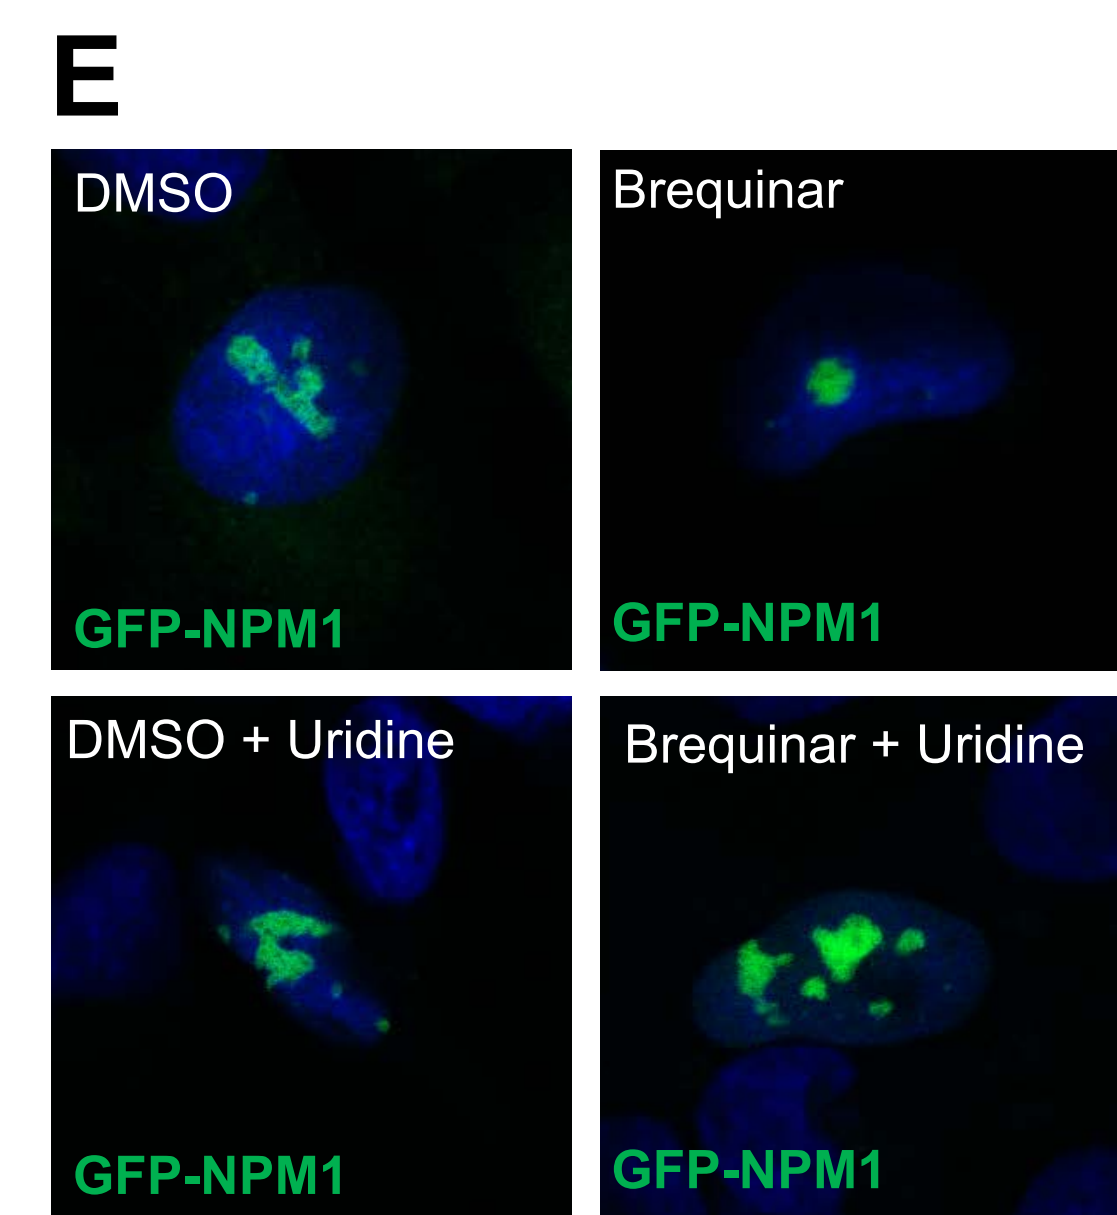

LN229  
Figure S6

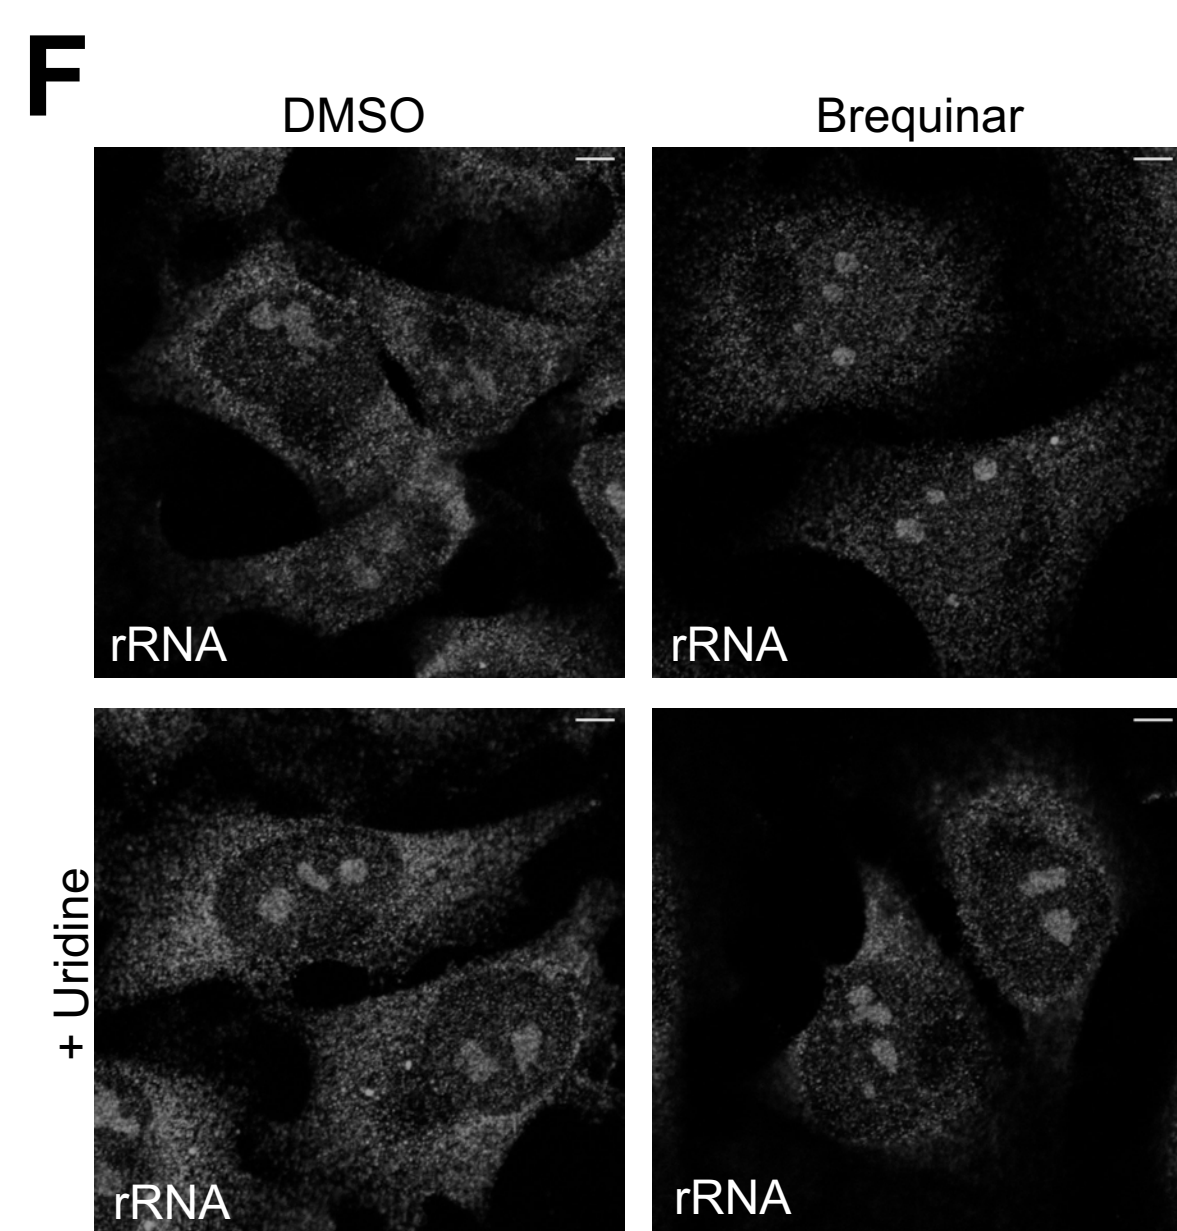

LN229

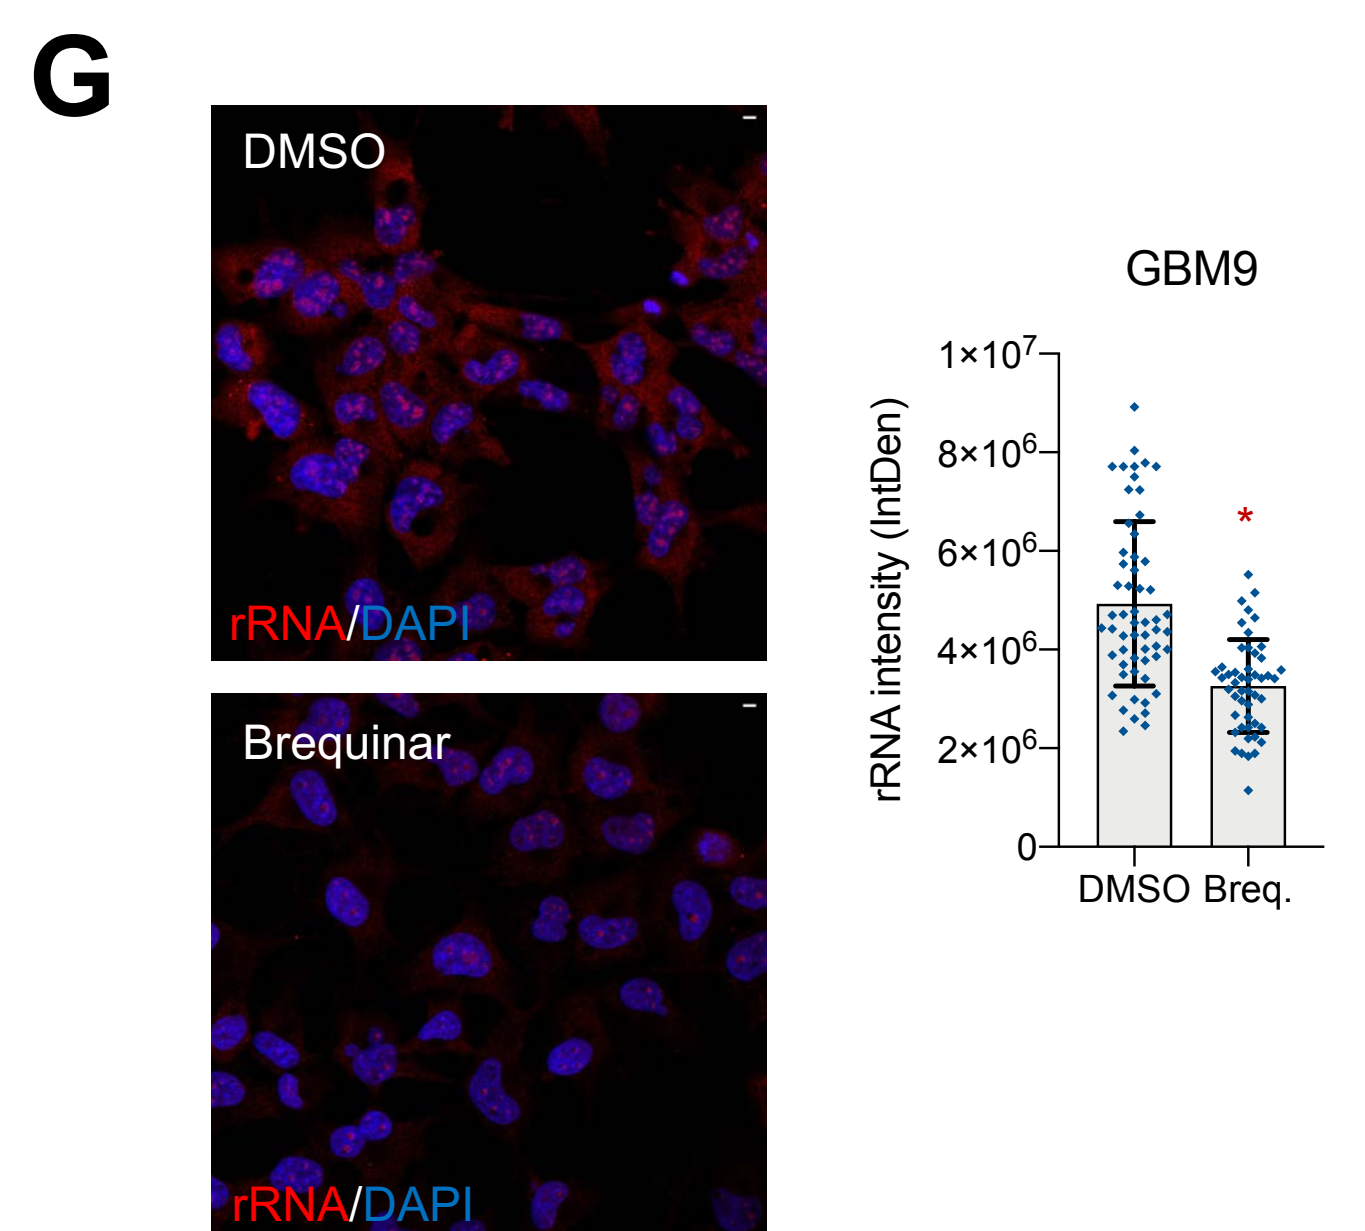

GBM9
