# Supplementary material for: Inhibition of the de novo pyrimidine biosynthesis pathway limits ribosomal RNA transcription causing nucleolar stress in glioblastoma cells
Source: PubMed Central journal article supplement (PMC7707548; doi:10.1371/journal.pgen.1009117), 2020-11-17
Supplement: pgen.1009117.s007.pdf [file pgen.1009117.s007.pdf]

**S1 Table. Brequinar reduces the levels of pyrimidine nucleotides specifically in glioblastoma tumor xenografts tissues.** Table showing the amounts of brequinar, UMP, UDP, UTP and uridine in the LN229 tumor xenografts, brain tissue, liver tissue and serum in each mouse.

|           |   | UMP         |              |             |             | UDP         |              |             |             | UTP         |              |             |             | Uridine     |              |             |             | Brequinar   |              |             |             |
|-----------|---|-------------|--------------|-------------|-------------|-------------|--------------|-------------|-------------|-------------|--------------|-------------|-------------|-------------|--------------|-------------|-------------|-------------|--------------|-------------|-------------|
|           |   | Xenog.      | Plasma       | Brain       | Liver       | Xenog.      | Plasma       | Brain       | Liver       | Xenog.      | Plasma       | Brain       | Liver       | Xenog.      | Plasma       | Brain       | Liver       | Xenog.      | Plasma       | Brain       | Liver       |
| Tumors    |   | µg/g tissue | µg/ml plasma | µg/g tissue | µg/g tissue | µg/g tissue | µg/ml plasma | µg/g tissue | µg/g tissue | µg/g tissue | µg/ml plasma | µg/g tissue | µg/g tissue | µg/g tissue | µg/ml plasma | µg/g tissue | µg/g tissue | µg/g tissue | µg/ml plasma | µg/g tissue | µg/g tissue |
| Control   | 6 | 38.66       | 0.00         | 1.68        | 28.83       | 3.34        | N/A          | 0.06        | 2.55        | 0.55        | N/A          | 0.06        | 0.20        | 9.32        | 0.91         | 2.21        | 0.87        | 0.00        | 0.04         | 0.00        | 0.04        |
|           | 3 | 48.73       | 0.36         | 2.29        | 24.70       | 8.58        | N/A          | 0.10        | 2.77        | 0.45        | N/A          | 0.03        | 0.15        | 6.05        | 1.41         | 1.72        | 0.74        | 0.00        | 0.13         | 0.00        | 0.01        |
|           | 2 | 34.95       | 0.79         | 2.48        | 19.46       | 5.30        | N/A          | 0.10        | 1.65        | 0.55        | N/A          | 0.05        | 0.14        | 6.19        | 1.67         | 1.64        | 0.71        | 0.00        | 0.03         | 0.00        | 0.05        |
|           | 5 | 48.52       | N/A          | 2.20        | 24.48       | 9.23        | N/A          | 0.08        | 2.88        | 0.72        | N/A          | 0.04        | 0.15        | 7.24        | N/A          | 1.78        | 0.92        | 0.00        | 0.05         | 0.00        | 0.09        |
|           | 4 | 34.87       | N/A          | 2.40        | 21.78       | 4.72        | N/A          | 0.10        | 2.10        | 0.72        | N/A          | 0.03        | 0.15        | 5.70        | N/A          | 1.57        | 0.73        | 0.05        | 0.69         | 0.00        | 0.00        |
|           | 1 | 46.88       | N/A          | 5.30        | 14.96       | 9.80        | N/A          | 0.19        | 1.39        | 0.57        | N/A          | 0.17        | 0.10        | 4.46        | N/A          | 2.13        | 1.21        | 0.29        | 4.29         | 0.06        | -0.57       |
|           | 7 | 50.35       | N/A          | 2.13        | 25.11       | 2.61        | N/A          | 0.07        | 2.99        | 0.08        | N/A          | 0.02        | 0.14        | 8.75        | N/A          | 2.29        | 0.97        | 0.00        | 0.00         | 0.00        | 0.06        |
| Brequinar | 2 | 0.59        | 0.17         | 2.00        | 22.95       | 0.06        | N/A          | 0.09        | 2.42        | 0.10        | N/A          | 0.02        | 0.13        | 3.45        | 1.59         | 1.36        | 0.40        | 9.92        | 26.15        | 1.60        | 89.19       |
|           | 6 | 15.40       | N/A          | 1.60        | 17.15       | 0.54        | N/A          | 0.09        | 1.36        | 0.04        | N/A          | 0.02        | 0.04        | 2.17        | N/A          | 1.35        | 0.37        | 7.44        | 20.15        | 1.14        | 74.65       |
|           | 3 | 18.52       | 0.00         | 2.16        | 25.50       | 1.39        | N/A          | 0.09        | 3.08        | 0.08        | N/A          | 0.02        | 0.15        | 1.47        | 1.02         | 1.74        | 0.43        | 8.28        | 29.40        | 2.17        | 89.42       |
|           | 5 | 5.12        | 1.90         | 1.98        | 23.60       | 0.08        | N/A          | 0.08        | 2.35        | 0.02        | N/A          | 0.03        | 0.10        | 3.42        | 0.92         | 1.53        | 0.39        | 8.00        | 27.15        | 1.24        | 54.33       |
|           | 4 | 17.63       | 1.84         | 1.96        | 16.52       | 0.92        | N/A          | 0.09        | 1.80        | 0.06        | N/A          | 0.03        | 0.12        | 1.72        | 1.30         | 1.61        | 0.49        | 5.80        | 26.70        | 1.41        | 49.79       |
|           | 7 | 16.01       | N/A          | 1.96        | 17.95       | 0.80        | N/A          | 0.09        | 1.85        | 0.07        | N/A          | 0.03        | 0.06        | 1.79        | N/A          | 1.86        | 0.52        | 4.92        | 24.45        | 2.41        | 57.50       |
|           | 1 | 3.89        | 0.00         | 1.75        | 16.70       | 0.09        | N/A          | 0.08        | 1.66        | 0.06        | N/A          | 0.03        | 0.14        | 3.68        | 1.21         | 1.45        | 0.52        | 6.72        | 23.40        | 2.20        | 40.68       |
