# Supplementary material for: Inhibition of the de novo pyrimidine biosynthesis pathway limits ribosomal RNA transcription causing nucleolar stress in glioblastoma cells
Source: PubMed Central journal article supplement (PMC7707548; doi:10.1371/journal.pgen.1009117), 2020-11-17
Supplement: pgen.1009117.s008.pdf [file pgen.1009117.s008.pdf]

**S2 Table. Cell lines, antibodies, siRNA, primers, and reagents used in the present manuscript.**

| <b>Cell lines</b>                   | <b>Source</b>              | <b>Identifier</b>           |
|-------------------------------------|----------------------------|-----------------------------|
| p14/ARF -/- human Astrocytes        | Marc Diamond lab           | N/A                         |
| ARPE                                | Sandra Schmid lab          | N/A                         |
| LN229                               | Ralph DeBerardinis lab     | N/A                         |
| SF188                               | Ralph DeBerardinis lab     | N/A                         |
| GBM9                                | Sandeep Burma              | CRG del Alcazar et al. 2014 |
| <b>Antibodies</b>                   |                            |                             |
| <b>Antibodies</b>                   | <b>Source</b>              | <b>Identifier</b>           |
| DHODH                               | Proteintech                | 14877-1-AP                  |
| UMPS                                | Sigma                      | HPA036178-100UL             |
| ACTIN                               | Cell Signaling             | 13E5, #4970                 |
| TUBULIN                             | Sigma                      | T6199-100UL                 |
| p53                                 | Calbiochem                 | JA1308                      |
| p21                                 | Santa Cruz Biotechnology   | C-19                        |
| phospho S139-H2AX ( $\gamma$ -H2AX) | Abcam                      | phospho S139, ab11174       |
| MGMT                                | Sigma Millipore            | MAB16200                    |
| GFAP                                | Abcam                      | whole antiserum, ab7260-50  |
| ACETYL-TUBULIN                      | Sigma                      | T7451-100UL                 |
| UBF                                 | Santa Cruz Biotechnology   | F-9, sc-13125               |
| NPM1                                | Santa Cruz Biotechnology   | 0412, sc-47725              |
| rRNA                                | Novus biologicals          | Y10b, NB100-662SS           |
| HIF1alpha                           | Novus biologicals          | NB100-105                   |
| <b>Chemicals, nucleotides</b>       |                            |                             |
| <b>Chemicals, nucleotides</b>       | <b>Source</b>              | <b>Identifier</b>           |
| Brequinar sodium                    | Tocris                     | 6196/50                     |
| Brequinar                           | Cayman chemical            | 24445                       |
| ML390                               | Cayman chemical            | 21395                       |
| 5-Fluorouracil                      | Sigma                      | F6627                       |
| Temozolomide                        | Sigma                      | T2577                       |
| Uridine                             | Alfa Aesar™                | AAA1522706                  |
| <b>Oligonucleotides for qPCR</b>    |                            |                             |
| <b>Gene</b>                         | <b>F sequence</b>          | <b>R sequence</b>           |
| human pre-rRNA 47S                  | GTCCCCTCGTCTCTCCTCTC       | CAAGTCGACAACCACTGGAG        |
| human and mouse rRNA 18S            | CTGCCCTATCAACTTTTCGATGGTAG | CCGTTTCTCAGGCTCCCTCTC       |
| human and mouse rRNA 28S            | TGTCGGCTCTTCCTATCATTGT     | ACCCAGCTCACGTTCCCTATTA      |
| human VEGFA                         | TCTTCAAGCCATCCTGTGTG       | TGCATTACATTTGTTGTGC         |
| human beta Actin                    | GGACTTCGAGCAAGAGATGG       | AGCACTGTGTTGGCGTACAG        |
| mouse pre-rRNA 47S                  | GCGTCGTTGCTCACTCTTAG       | CACACATCCACAAGGACCAC        |
| mouse beta Actin                    | TGTTACCAACTGGGACGACA       | GGGGTGTGAAGGTCTCAA          |
| <b>siRNA oligonucleotides</b>       |                            |                             |
| <b>siRNA oligonucleotides</b>       | <b>Source</b>              | <b>Identifier</b>           |
| universal controls #1               | Sigma mission              | SIC001                      |
| universal controls #2               | Sigma mission              | SIC002                      |
| siRNA DHODH1-1                      | Sigma mission              | SASI_Hs01_00246561          |
| siRNA DHODH1-2                      | Sigma mission              | SASI_Hs01_00246562          |
